# Supplementary material for: Functional kinomics establishes a critical node of volume-sensitive cation-Cl− cotransporter regulation in the mammalian brain
Source: PubMed Central journal article supplement (PMC5080614; doi:10.1038/srep35986), 2016-10-26
Supplement: srep35986-s1.pdf [file srep35986-s1.pdf]

## SUPPLEMENTARY-

### Functional kinomics establishes a critical node of volume-sensitive cation-Cl<sup>-</sup> cotransporter regulation in the mammalian brain

Jinwei Zhang<sup>1,2\*</sup>, Geng Gao<sup>3</sup>, Gulnaz Begum<sup>4</sup>, Jinhua Wang<sup>5,6</sup>, Arjun R. Khanna<sup>7</sup>, Boris E. Shmukler<sup>8</sup>, Gerrit Daubner<sup>1</sup>, Paola de los Heros<sup>1</sup>, Paul Davies<sup>1</sup>, Joby Varghese<sup>1</sup>, Mohammad Iqbal H. Bhuiyan<sup>4</sup>, JingJing Duan<sup>2,9</sup>, Jin Zhang<sup>9</sup>, Daniel Duran<sup>2</sup>, Seth L. Alper<sup>8</sup>, Dandan Sun<sup>4,10</sup>, Stephen J. Elledge<sup>11</sup>, Dario R. Alessi<sup>1</sup>, and Kristopher T. Kahle<sup>12\*</sup>

<sup>1</sup> MRC Protein Phosphorylation and Ubiquitylation Unit, College of Life Sciences, University of Dundee, Dundee DD1 5EH, Scotland

<sup>2</sup> Departments of Neurosurgery and Pediatrics, Yale School of Medicine, New Haven, CT 06511 USA

<sup>3</sup> Division of Genetics, Brigham and Women's Hospital, Boston, MA 02115 USA

<sup>4</sup> Department of Neurology, University of Pittsburgh School of Medicine, Pittsburgh, PA 15213

<sup>5</sup> Department of Cancer Biology, Dana-Farber Cancer Institute, Boston, MA 02115, USA.

<sup>6</sup> Department of Biological Chemistry & Molecular Pharmacology, Harvard Medical School, 250 Longwood Ave, SGM 628, Boston, MA 02115, USA.

<sup>7</sup> Department of Neurosurgery, Massachusetts General Hospital, Boston, MA 02114 USA

<sup>8</sup> Division of Nephrology and Department of Medicine, Beth Israel Deaconess Medical Center, Boston; Department of Medicine, Harvard Medical School, Boston, MA -022154 USA

<sup>9</sup> Department of Cardiology, Howard Hughes Medical Institute, Boston Children's Hospital, Boston, Massachusetts 02115, USA.

<sup>10</sup> Veterans Affairs Pittsburgh Health Care System, Geriatric Research, Educational and Clinical Center, Pittsburgh, PA, USA

<sup>11</sup> Department of Genetics, Harvard University Medical School, Howard Hughes Medical Institute, Boston, Massachusetts 02115 USA.

<sup>12</sup> Departments of Pediatrics and Cellular & Molecular Physiology; Interdepartmental Neuroscience Program; and Centers for Mendelian Genomics, Yale School of Medicine, New Haven, CT 06511 USA

\*To whom correspondence should be addressed:

Jinwei Zhang Ph.D. and Kristopher T. Kahle M.D., Ph.D.

Yale School of Medicine

333 Cedar Street, TMP 430

New Haven, CT 06520

Phone: +1-203-737-2096

Fax: +1-203-785-2044

E-mail: j.c.zhang@dundee.ac.uk; kristopher.kahle@yale.edu

1 **SUPPLEMENTARY FIGURES**

2

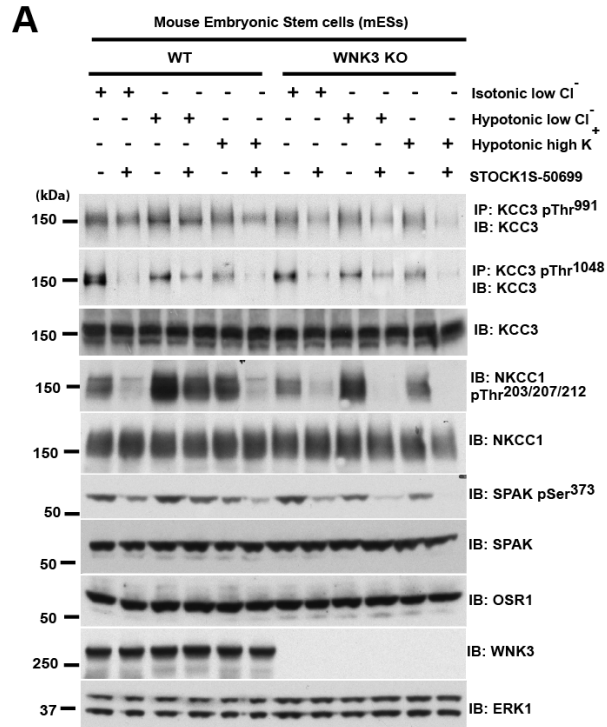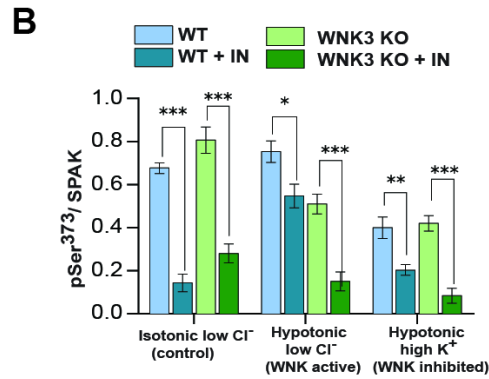

3

4 **Supplementary Figure 1: Validation of siRNA screen hits using knockout cell**  
 5 **models.**

6 **(A)** WNK3-SPAK/OSR1 regulation and phosphorylation of endogenous KCC3. Matched WNK3 WT and  
 7 WNK3 KO ES cells<sup>1</sup> were incubated 30 min with either control isotonic media, hypotonic low Cl<sup>-</sup> media or  
 8 hypotonic high K<sup>+</sup> media in the absence or presence of STOCKS1-50699 (IN). The lysates were then  
 9 subjected to immunoblot with the indicated antibodies. Molecular masses (kDa) are at left. Similar results  
 10 were obtained in 3 separate experiments. See **Figure 2A** for Western blot quantitation. **(B)** All analyses  
 11 presented in **A** were also conducted in hypotonic high K<sup>+</sup> media which, like hypotonic low Cl<sup>-</sup> media,

1 activates KCC3 and promotes its dephosphorylation. Results presented here are analogous to those for  
 2 hypotonic, high K<sup>+</sup> media in **Figure 2A**.

3

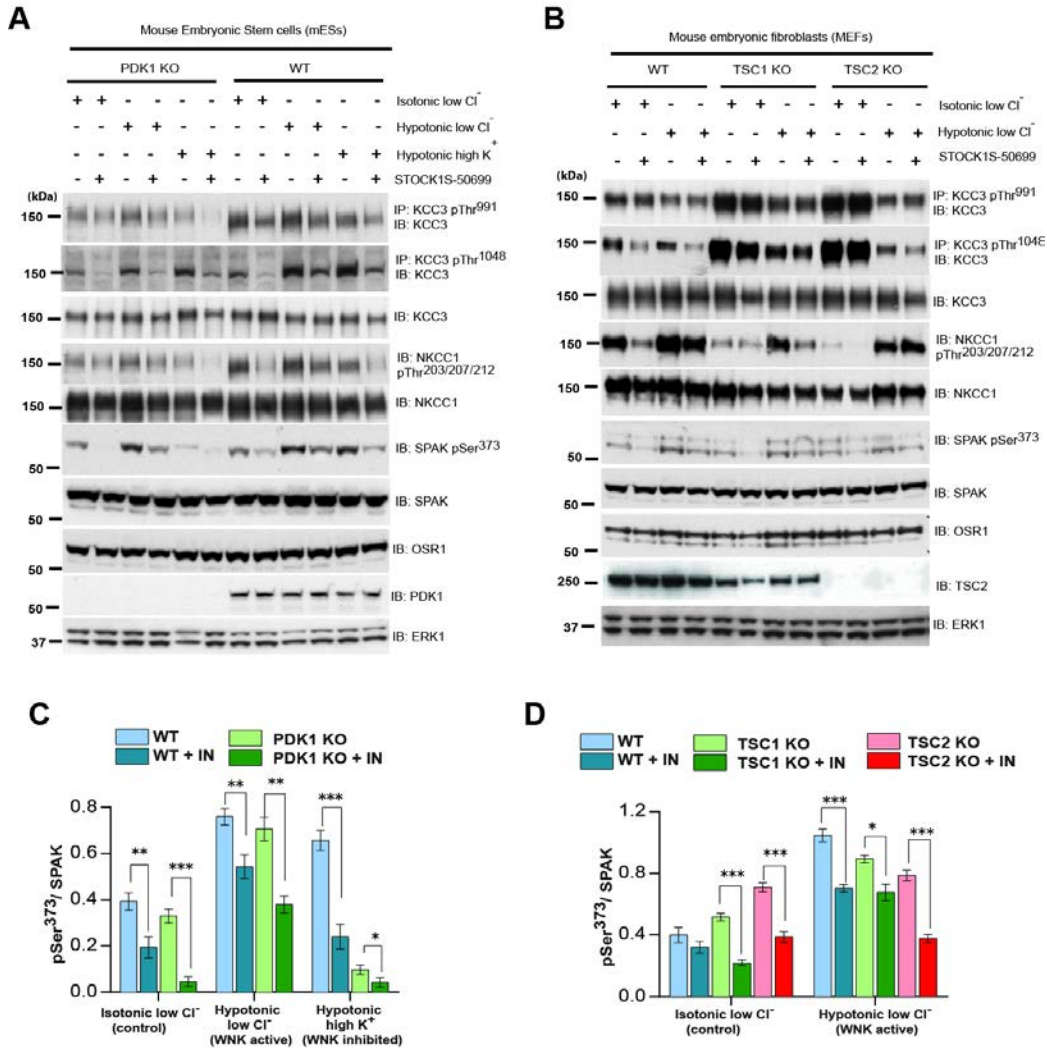

4

5 **Supplementary Figure 2: Validation of siRNA screen hits using knockout cell**  
 6 **models.**

7 **(A)** PDK1 regulation and phosphorylation of endogenous KCC3. Matched WT and double PDK1 knock-  
 8 out ES cells<sup>2</sup> were treated as in (Supplementary Figure 1A). See **Figure 2B** for Western blot quantitation.

9 **(B)** TSC1 or TSC2 regulation and phosphorylation of endogenous KCC3. Previously described matched  
 10 WT and TSC1 or TSC2 mouse embryonic fibroblast (MEF) cells<sup>3</sup>, were treated as in (**Supplementary**

11 **Figure 1A**). See **Figure 2C** for Western blot quantitation. **(C-D)** All analyses presented in  
 12 **Supplementary Figure 2A and B** were also conducted in hypotonic, high K<sup>+</sup> media. Results presented

13 here are analogous to those for hypotonic, high K<sup>+</sup> media in **Figure 2B and C**. IN, STOCK1S-50699.

14

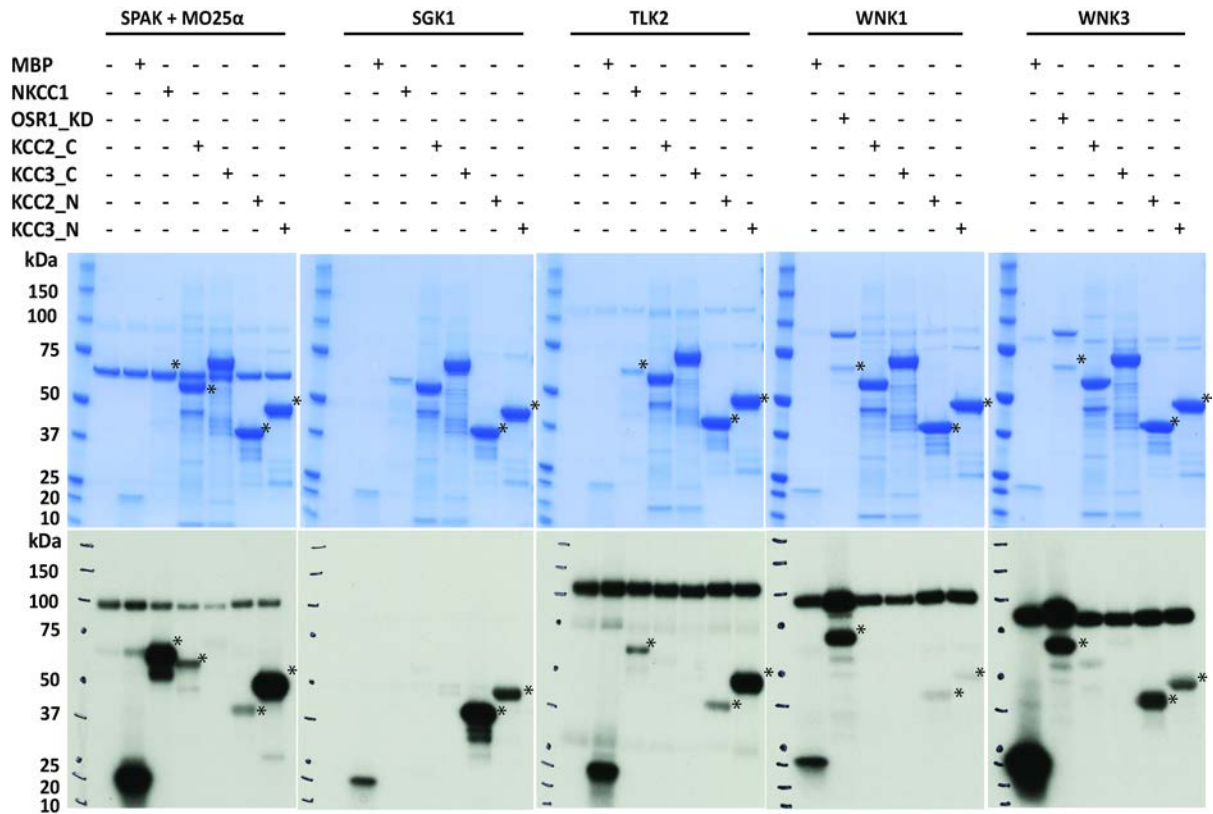

1  
2 **Supplementary Figure 3: *In vitro* kinase assays of candidate KCC3 regulatory**  
3 **kinases.**

4 WNK1 (residues 1-491), WNK3 (1-434), KCC2A-N (1-119), KCC2A-C (852-1039), KCC3A-N (1-175),  
5 KCC3A-C (886-1141), NKCC1 (1-288), OSR1 D164A (1-527) were expressed in bacteria. TLK2 (1-750)  
6 and SGK1 (60-431) were expressed in baculovirus. MBP (Sigma, M1891) and activated SPAK (Carna  
7 Biosciences, 07-130) were purchased. The N-terminal cytoplasmic domain and C-terminal cytoplasmic  
8 domain of KCC2A (5  $\mu$ g) and KCC3A (5  $\mu$ g) and control proteins MBP (0.5  $\mu$ g), N-terminal cytoplasmic  
9 domain of NKCC1 (5  $\mu$ g) and OSR1 D164A (5  $\mu$ g) were incubated with 0.08  $\mu$ M of SPAK (in the presence  
10 of 10-fold molar excess of MO25 $\alpha$ ), SGK1, TLK2, WNK1 or WNK3. Reactions were performed for 1 h at  
11 30°C in a buffer containing 50 mM Tris-HCl (pH = 7.5), 0.1 mM EGTA, 5 mM MgCl<sub>2</sub>, 0.1%  
12 Mercaptoethanol and 0.1 mM Mg-[ $\gamma$ <sup>32</sup>P]ATP (~200 cpm/pmol) and stopped by adding LDS sample buffer.  
13 Phosphorylation of substrates was analysed following electrophoresis of the Colloidal blue-stained bands  
14 (upper panels) and autoradiography (lower panels). An asterisk indicates the bands corresponding to the  
15 NTD and CTD fragments. Molecular weight (kDa) is at left of each gel.

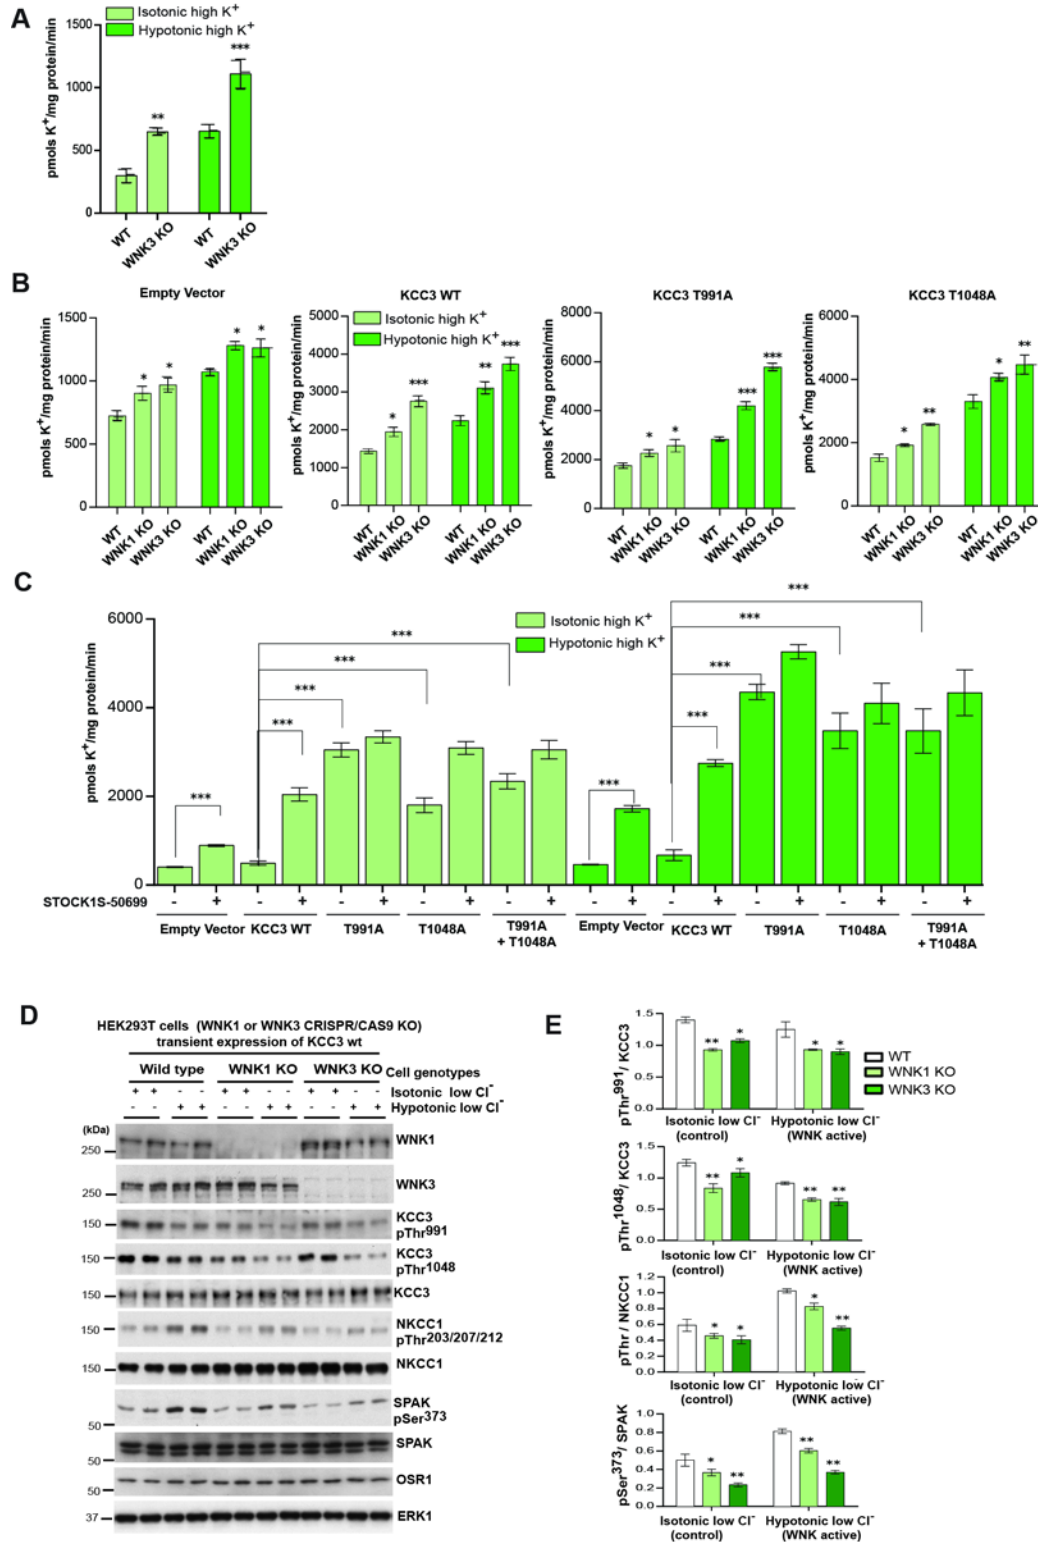

1

2 **Supplementary Figure 4: WNK3-SPAK kinase regulates the phosphorylation and**  
 3 **function of KCC3.**

1 (A)  $^{86}\text{Rb}^+$  uptake assays in WNK3 WT and KO ES cells. WT and WNK3 KO cells<sup>1</sup> were incubated with  
2 control isotonic high  $\text{K}^+$  media or KCC3-activating hypotonic high  $\text{K}^+$  media for 30 min in the presence of 1  
3 mM ouabain and 0.1 mM bumetanide.  $^{86}\text{Rb}^+$  uptake proceeded for 10 min and was then quantified by  
4 scintillation counting. \*\*\*,  $p < 0.001$ ; \*\*,  $p < 0.01$ ; \*,  $p < 0.05$ , when compared to WT values under the same  
5 conditions. (B)  $^{86}\text{Rb}^+$  uptake assays in WT, WNK3 KO and WNK1 KO HEK293T cells. The indicated cells  
6 were transfected with constructs encoding a Flag empty vector or the indicated WT or mutant constructs  
7 (against KCC3 Thr<sup>991</sup> and Thr<sup>1048</sup>) of N-terminal FLAG-tagged KCC3. 36 h post-transfection, cells were  
8 treated for 30 min with control isotonic high  $\text{K}^+$  or hypotonic high  $\text{K}^+$  conditions. 10 min  $^{86}\text{Rb}^+$  uptake  
9 assays were then carried out in the presence of 1 mM ouabain and 0.1 mM bumetanide and quantitated  
10 by scintillation counting. Results are presented as means  $\pm$  SEM for triplicate samples. \*\*\*,  $p < 0.001$ ; \*\*,  
11  $p < 0.01$ ; \*,  $p < 0.05$ , when compared to WT values under the same conditions. Cell lysates from in parallel  
12 experiment were also subjected to immunoblot analysis (**Supplementary Figure 4D-E**). (C)  $^{86}\text{Rb}^+$  uptake  
13 assays in the absence and presence of STOCK1S-50699. HEK-293 cells were transfected and treated as  
14 in (B). 10 min  $^{86}\text{Rb}^+$  uptake assays were carried out in the presence of 1 mM ouabain and 0.1 mM  
15 bumetanide plus/minus 10  $\mu\text{M}$  STOCK1S-50699 and quantitated by scintillation counting of triplicate  
16 samples (C means  $\pm$  SEM). (D) as in (B) HEK293T WT, WNK3 KO and WNK1 KO cells (see Methods)  
17 were each transfected with WT KCC3, KCC3 Thr<sup>991</sup>Ala and KCC3 Thr<sup>1048</sup>Ala mutants, and were treated  
18 for the indicated times with hypotonic low  $\text{Cl}^-$  conditions or control isotonic low  $\text{Cl}^-$  conditions. Harvested  
19 cell lysates were subjected to SDS-PAGE and Western blotting with the indicated antibodies as  
20 described. Molecular masses (kDa) are indicated at left. (E) Graphs show quantitation of Western blot  
21 ratios (phospho-KCC3) / (total KCC3) ( $n=3$ , means  $\pm$  SEM). \*\*\*,  $p < 0.001$ ; \*\*,  $p < 0.01$ ; \*,  $p < 0.05$ ; ns: non-  
22 significant (unpaired t-test). Under hypotonic low  $\text{Cl}^-$  conditions, WNK1 KO cells and WNK3 KO cells both  
23 exhibited decreased phosphorylation of heterologous KCC3 at Thr<sup>991</sup> ( $p < 0.001$ ) and Thr<sup>1048</sup> ( $p < 0.001$ ).  
24 WNK1 KO HEK293T cells and WNK3 KO HEK293T cells also exhibited apparent decreases in NKCC1  
25 Thr<sup>203</sup>/Thr<sup>207</sup>/Thr<sup>212</sup>, SPAK Ser<sup>373</sup>, and OSR1 Ser<sup>325</sup> phosphorylation ( $p < 0.05$ ).

26

## 27 REFERENCES

- 28 1. Thastrup, J.O. et al. SPAK/OSR1 regulate NKCC1 and WNK activity: analysis of WNK  
29 isoform interactions and activation by T-loop trans-autophosphorylation. *The*  
30 *Biochemical journal* **441**, 325-337 (2012).
- 31 2. Lawlor, M.A. et al. Essential role of PDK1 in regulating cell size and development in  
32 mice. *The EMBO journal* **21**, 3728-3738 (2002).
- 33 3. Pollizzi, K. et al. A hypomorphic allele of Tsc2 highlights the role of TSC1/TSC2 in  
34 signaling to AKT and models mild human TSC2 alleles. *Human molecular genetics* **18**,  
35 2378-2387 (2009).
